# Supplementary material
Source: publisher figshare collection journal article supplement (https://frontiersin.figshare.com/ndownloader/files/14044949)
Supplement: Supplementary file [file 14044949]

**A**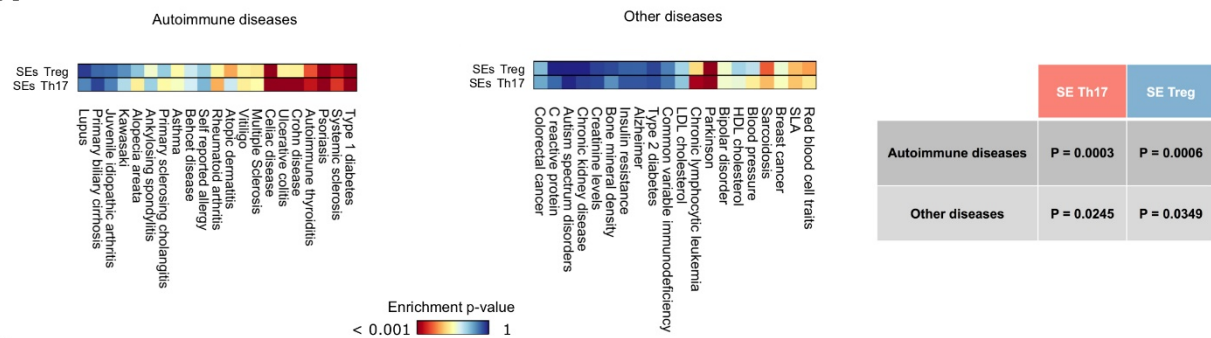**B**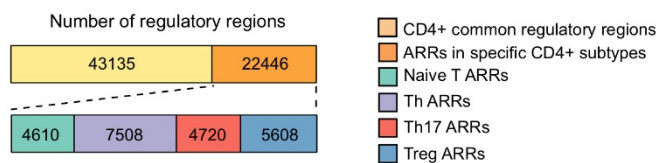**C**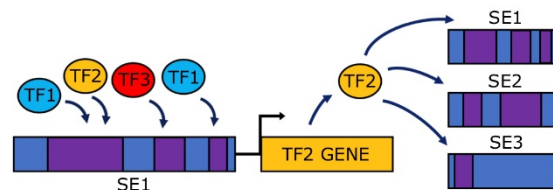

**Fig.S1. Supplementary bioinformatics results. A.** Results of SNPs analysis performed on predicted SEs in Th17 and Treg cells. Heatmap shows results of the single-trait-associated SNPs enrichment analysis. Table shows results of the enrichment analysis considering the two groups of diseases as a single trait. **B.** (RR) identified by considering a set of six regulatory states (emission parameter of H3K27ac and H3K4me1  $\geq 75$ ) from CD4+ genome segmentation analysis (Roadmap Epigenomics Consortium, 2015). Comparison of RRs among CD4+ cells subtypes define active regulatory regions (ARR) in a specific CD4+ subtype. **C.** Methodology used for inferring Th17 and Treg networks.
